# Supplementary material for: Environmentally sustainable biogenic fabrication of AuNP decorated-graphitic g-C3N4nanostructures towards improved photoelectrochemical performances
Source: Royal Society of Chemistry journal article supplement (doi:10.1039/c8ra00690c), 2018-01-01
Supplement: c8ra00690c1.pdf [file c8ra00690c1.pdf]

## Electronic Supplementary Information

### Environmentally Sustainable Biogenic Fabrication of AuNPs decorated-graphitic $g\text{-C}_3\text{N}_4$ Nanostructures towards Improved Photoelectrochemical Performances

Mohammad Ehtisham Khan<sup>1</sup>, Mohammad Mansoob Khan<sup>2\*</sup>, Moo Hwan Cho<sup>1\*</sup>

<sup>1</sup>School of Chemical Engineering, Yeungnam University, Gyeongsan, Gyeongbuk 38541, South Korea. Phone: +82-53-810-2517, Fax: +82-53- 810-4631.

<sup>2</sup>Chemical Sciences, Faculty of Science, Universiti Brunei Darussalam, Jalan Tungku Link, Gadong, BE1410, Brunei Darussalam.

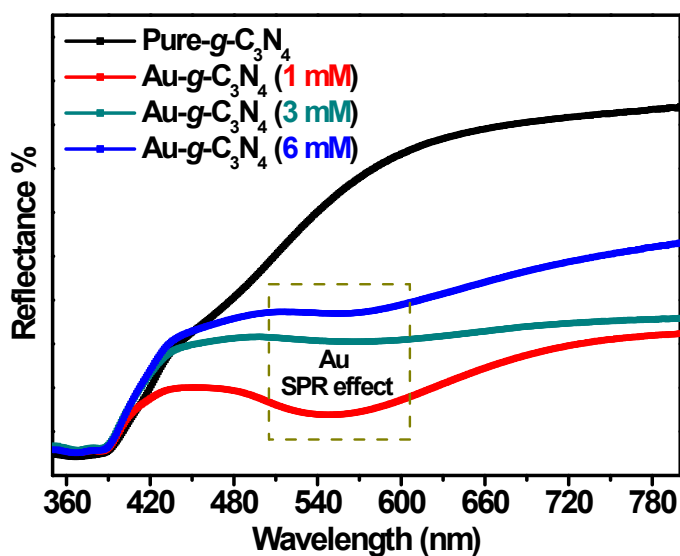

Fig. S1 Reflectance spectra of pure  $g\text{-C}_3\text{N}_4$  and  $\text{Au-g-C}_3\text{N}_4$  nanostructures.

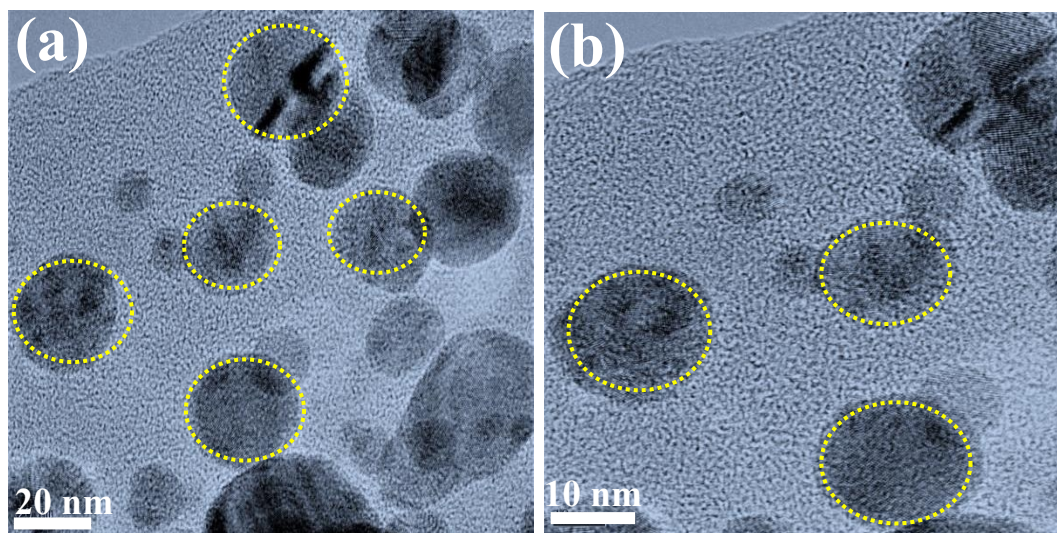

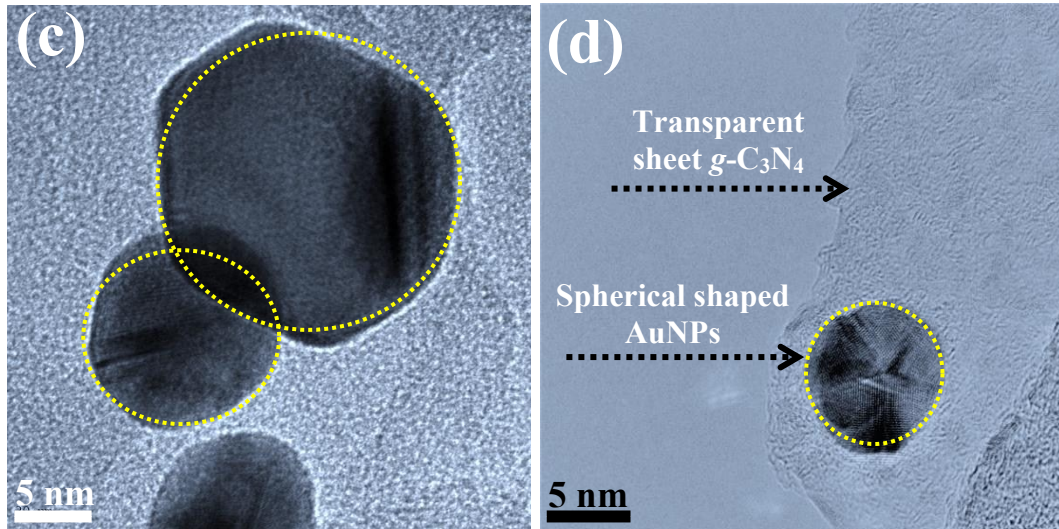

Fig. S2 HR-TEM images of Au-g-C<sub>3</sub>N<sub>4</sub> nanostructures.

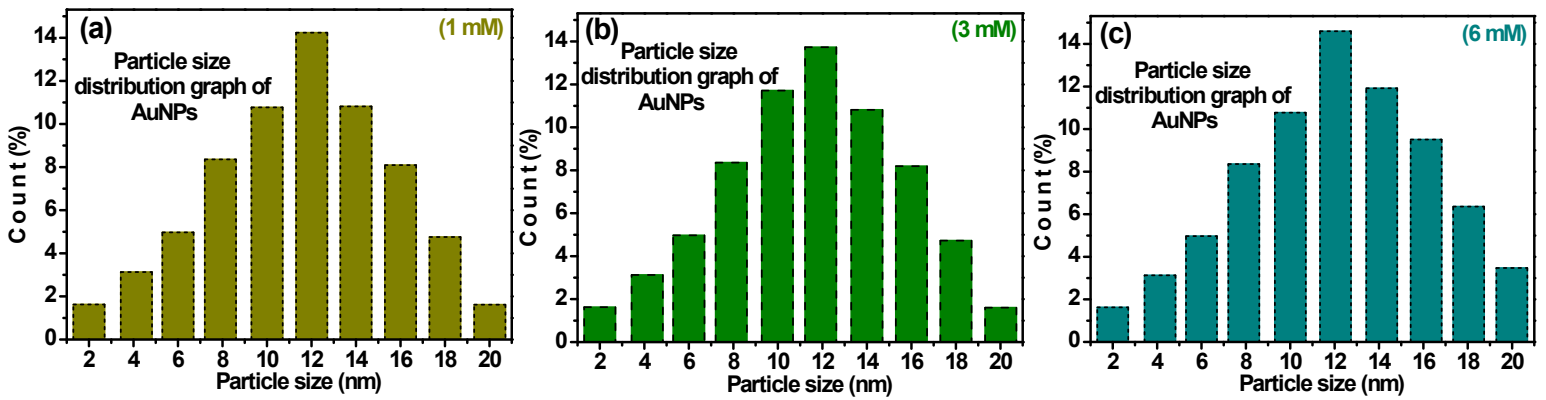

Fig. S3 (a, b and c) Particle size distribution graph of Au-g-C<sub>3</sub>N<sub>4</sub> nanostructures.
